# Supplementary material for: Photocatalytic hydrogen evolution using nanocrystalline gallium oxynitride spinel
Source: Royal Society of Chemistry journal article supplement (doi:10.1039/c4ta03676j), 2014-01-01
Supplement: c4ta03676j1.pdf [file c4ta03676j1.pdf]

## Supplementary Information

### Photocatalytic hydrogen evolution using nanocrystalline gallium oxynitride spinel

H. A. Naveen Dharmagunawardhane,<sup>a</sup> William R. Woerner,<sup>b</sup> Quiyan Wu,<sup>a</sup> Huafeng Huang,<sup>c</sup> Xianyin Chen,<sup>c</sup> Alexander Orlov,<sup>a</sup> Peter G. Khalifah,<sup>c,d</sup> and John B. Parise<sup>\*b,c</sup>

<sup>a</sup> Department of Materials Science and Engineering, Stony Brook University, Stony Brook, New York 11794, USA

<sup>b</sup> Department of Geosciences, Stony Brook University, Stony Brook, New York 11794, USA

<sup>c</sup> Department of Chemistry, Stony Brook University, Stony Brook, New York 11794, USA

<sup>d</sup> Department of Chemistry, Brookhaven National Laboratory, Upton, NY, 11973, USA

\*John.Parise@stonybrook.edu

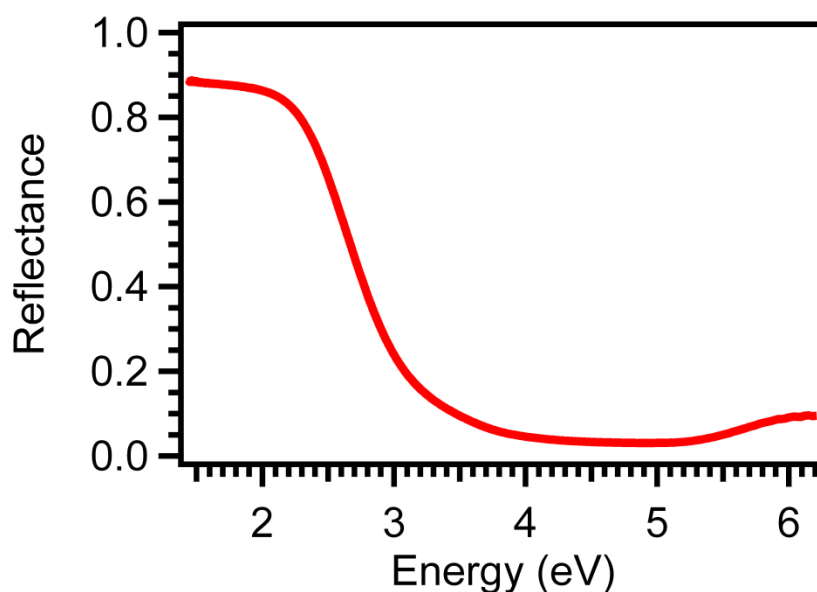

Figure S1. Diffuse reflectance raw data measured for oxynitride spinel synthesized by ammonolysing  $\text{Ga}(\text{NO}_3)_3 \cdot \text{H}_2\text{O}$ . The upturn above 5 eV is believed to be an experimental artefact attributed to the reduced reflectance of the  $\text{BaSO}_4$  100% reflectance standard at high energies.
